# Supplementary material
Source: publisher figshare collection journal article supplement (https://gsapubs.figshare.com/ndownloader/files/22397883)
Supplement: Supplementary file 1 [file 22397883]

| SUPPLEMENTAL TABLE 1. ANALYTICAL DATA FOR 40AR/39AR AGES | | | | | | | |
| --- | --- | --- | --- | --- | --- | --- | --- |
|  | | | | | | | |
| Step ID | Temp (C) | 40Ar/39Ar | K/Ca | 40Ar% | 39Ar% | Age | Error (2σ) |
| 12-5-01C (NM) | | | | | | | |
| A | 625 | 13784 | 0.29 | 2.39 | 0.30 | 716 | 362 |
| B | 700 | 8.52 | 0.30 | 21.20 | 6.90 | 4.83 | 0.46 |
| C | 750 | 3.42 | 0.31 | 42.90 | 7.40 | 3.91 | 0.22 |
| D | 800 | 2.66 | 0.32 | 56.60 | 16.40 | 4.018 | 0.122 |
| E | 875 | 2.48 | 0.32 | 61.30 | 20.60 | 4.049 | 0.118 |
| F | 975 | 2.90 | 0.22 | 53.40 | 15.90 | 4.139 | 0.152 |
| G | 1075 | 4.28 | 0.17 | 34.90 | 13.10 | 4 | 0.24 |
| H | 1250 | 11.87 | 0.04 | 11.50 | 16.20 | 3.68 | 0.62 |
| I | 1700 | 15.92 | 0.03 | 10.40 | 3.20 | 4.47 | 1.12 |
|  |  |  |  |  |  |  |  |
| 3-28-02 (NM) | | | | | | | |
| A | 625 | 15892 | 0.13 | 1.80 | 1.30 | 353 | 150 |
| B | 700 | 94.59 | 0.16 | 3.80 | 6.40 | 4.78 | 1.58 |
| C | 750 | 27.80 | 0.21 | 11.50 | 9.10 | 4.3 | 0.62 |
| D | 800 | 21.74 | 0.21 | 16.10 | 10.70 | 4.68 | 0.54 |
| E | 875 | 53.56 | 0.18 | 7.50 | 12.80 | 5.41 | 0.74 |
| F | 975 | 36.23 | 0.13 | 9.80 | 20.10 | 4.75 | 0.58 |
| G | 1075 | 14.28 | 0.17 | 21.70 | 12.90 | 4.16 | 0.3 |
| H | 1250 | 37.51 | 0.05 | 7.10 | 23.50 | 3.56 | 0.54 |
| I | 1650 | 86.22 | 0.03 | 5.20 | 3.20 | 6.01 | 1.66 |
|  |  |  |  |  |  |  |  |
| 12-5-01B (MIT) | | | | | | | |
| 1 | 527 | 11.44 | 0.15 | 24.62 | 2.76 | 45.95 | 12.25 |
| 2 | 627 | 5.56 | 0.17 | 36.26 | 4.88 | 22.47 | 2.39 |
| 3 | 727 | 1.55 | 0.14 | 18.43 | 13.10 | 6.30 | 0.99 |
| 4 | 827 | 0.67 | 0.17 | 23.97 | 17.13 | 2.73 | 1.3 |
| 5 | 927 | 2.02 | 0.13 | 91.92 | 11.93 | 8.20 | 0.93 |
| 6 | 1027 | 0.76 | 0.15 | 22.63 | 13.03 | 3.10 | 1.81 |
| 7 | 1277 | 1.04 | 0.04 | 47.40 | 35.64 | 4.24 | 0.24 |
| 8 | 1527 | 0.00 | 0.02 | 0.00 | 1.54 | 0.00 | 0 |
|  |  |  |  |  |  |  |  |
| 12-4-01A (MIT) | | | | | | | |
| 1 | 527 | 7.92 | 0.85 | 18.29 | 2.28 | 32.56 | 12.63 |
| 2 | 627 | 3.80 | 1.01 | 87.89 | 4.36 | 15.71 | 4.97 |
| 3 | 727 | 4.31 | 1.29 | 86.66 | 16.49 | 17.80 | 1.15 |
| 4 | 827 | 3.13 | 1.63 | 94.43 | 32.52 | 12.96 | 0.37 |
| 5 | 927 | 3.02 | 1.83 | 89.69 | 27.92 | 12.50 | 0.57 |
| 6 | 1027 | 2.84 | 0.95 | 75.43 | 9.77 | 11.74 | 2.55 |
| 7 | 1127 | 3.39 | 0.27 | 78.28 | 4.34 | 14.02 | 5.95 |
| 8 | 1227 | 2.49 | 0.09 | 45.00 | 1.20 | 10.32 | 24.19 |
| 9 | 1327 | 2.83 | 0.09 | 56.23 | 1.13 | 11.72 | 27.49 |
|  |  |  |  |  |  |  |  |
| 12-7-01B (MIT) | | | | | | | |
| 1 | 527 | 1.51 | 1.37 | 7.67 | 4.65 | 6.25 | 8.55 |
| 2 | 627 | 3.23 | 1.10 | 48.01 | 3.95 | 13.34 | 4.9 |
| 3 | 727 | 4.75 | 0.68 | 74.52 | 8.94 | 19.58 | 1.94 |
| 4 | 827 | 3.17 | 0.93 | 80.52 | 17.76 | 13.12 | 0.82 |
| 5 | 927 | 2.99 | 1.23 | 82.06 | 23.74 | 12.36 | 2.44 |
| 6 | 1027 | 3.30 | 0.86 | 73.32 | 21.57 | 13.64 | 1.98 |
| 7 | 1127 | 5.02 | 0.26 | 86.22 | 10.23 | 20.73 | 4.25 |
| 8 | 1277 | 2.05 | 0.09 | 32.18 | 6.70 | 8.50 | 4.54 |
| 9 | 1550 | 1.25 | 0.13 | 14.49 | 2.47 | 5.18 | 19.6 |
|  |  |  |  |  |  |  |  |
| 12-7-01D (MIT) | | | | | | | |
| 1 | 777 | 0.90 | 7.57 | 16.16 | 1.32 | 3.73 | 43.07 |
| 2 | 827 | 4.21 | 8.23 | 97.79 | 3.27 | 17.37 | 10.14 |
| 3 | 877 | 3.20 | 19.71 | 85.29 | 6.68 | 13.23 | 4.16 |
| 4 | 927 | 2.94 | 53.94 | 79.69 | 12.68 | 12.16 | 1.15 |
| 5 | 977 | 3.28 | 19.34 | 88.07 | 23.22 | 13.55 | 0.65 |
| 6 | 1027 | 3.25 | 9.18 | 81.39 | 22.03 | 13.43 | 0.77 |
| 7 | 1077 | 3.29 | 3.39 | 78.23 | 15.89 | 13.62 | 0.99 |
| 8 | 1227 | 3.64 | 2.82 | 87.90 | 14.90 | 15.06 | 1.39 |
|  |  |  |  |  |  |  |  |
| 12-2-01E (NM) | | | | | | | |
| B | 700 | 9.90 | 4.50 | 36.90 | 5.00 | 9.71 | 0.34 |
| C | 750 | 8.56 | 4.10 | 51.70 | 5.40 | 11.75 | 0.24 |
| D | 800 | 8.80 | 3.70 | 54.20 | 11.40 | 12.66 | 0.22 |
| E | 875 | 9.63 | 3.30 | 50.40 | 23.30 | 12.89 | 0.26 |
| F | 975 | 10.62 | 3.00 | 47.20 | 24.60 | 13.3 | 0.28 |
| G | 1075 | 11.38 | 2.40 | 44.30 | 12.50 | 13.37 | 0.32 |
| H | 1250 | 13.37 | 0.99 | 37.80 | 9.50 | 13.42 | 0.42 |
| I | 1700 | 12.77 | 0.73 | 41.40 | 8.30 | 14.05 | 0.38 |
|  |  |  |  |  |  |  |  |
| 12-7-01C (MIT) | | | | | | | |
| 1 | 527 | 12.35 | 0.56 | 68.26 | 2.60 | 50.53 | 28.05 |
| 2 | 627 | 2.60 | 0.55 | 47.40 | 4.09 | 10.74 | 23.05 |
| 3 | 727 | 3.51 | 0.79 | 60.22 | 12.63 | 14.50 | 3.09 |
| 4 | 827 | 3.42 | 0.78 | 88.42 | 25.23 | 14.14 | 1.46 |
| 5 | 927 | 3.52 | 1.08 | 98.62 | 29.93 | 14.56 | 1.34 |
| 6 | 1027 | 3.59 | 0.85 | 98.22 | 13.21 | 14.82 | 1.63 |
| 7 | 1127 | 2.22 | 0.17 | 64.31 | 8.39 | 9.21 | 3.1 |
| 8 | 1227 | 3.52 | 0.15 | 99.97 | 3.25 | 14.56 | 0.25 |
| 9 | 1550 | 9.04 | 0.20 | 99.99 | 0.67 | 37.12 | 2.5 |
|  |  |  |  |  |  |  |  |
| 06-12-03C (NM) | | | | | | | |
| A | 650 | 853.40 | 3.00 | 1.70 | 0.30 | 18.8 | 12.6 |
| B | 750 | 16.33 | 4.00 | 67.80 | 0.50 | 14.78 | 1 |
| C | 850 | 13.09 | 9.40 | 83.60 | 1.70 | 14.61 | 0.34 |
| D | 920 | 11.43 | 21.90 | 91.70 | 5.60 | 13.994 | 0.126 |
| E | 1000 | 10.11 | 84.80 | 96.30 | 28.30 | 13.004 | 0.06 |
| F | 1075 | 10.66 | 62.20 | 94.60 | 25.40 | 13.469 | 0.062 |
| G | 1110 | 11.51 | 12.00 | 88.40 | 10.60 | 13.578 | 0.086 |
| H | 1180 | 12.30 | 5.00 | 81.80 | 12.70 | 13.432 | 0.09 |
| I | 1210 | 12.15 | 8.90 | 82.90 | 9.60 | 13.453 | 0.096 |
| J | 1250 | 11.92 | 15.50 | 85.20 | 4.80 | 13.565 | 0.162 |
| K | 1300 | 12.01 | 6.10 | 86.00 | 0.50 | 13.79 | 0.74 |
|  |  |  |  |  |  |  |  |
| 12-7-01A (NM) | | | | | | | |
| A | 625 | 724 | 0.94 | 3.48 | 0.40 | 66 | 28 |
| B | 700 | 7.50 | 1.10 | 68.80 | 5.10 | 13.706 | 0.182 |
| C | 750 | 6.03 | 1.00 | 87.90 | 4.90 | 14.067 | 0.118 |
| D | 800 | 5.66 | 1.10 | 90.80 | 10.80 | 13.645 | 0.092 |
| E | 875 | 5.54 | 1.50 | 91.70 | 18.10 | 13.51 | 0.112 |
| F | 975 | 6.06 | 1.60 | 83.90 | 25.00 | 13.508 | 0.118 |
| G | 1075 | 8.97 | 1.50 | 56.20 | 22.00 | 13.4 | 0.22 |
| H | 1250 | 10.76 | 0.19 | 47.90 | 12.40 | 13.71 | 0.3 |
| I | 1700 | 13.68 | 0.08 | 37.40 | 1.30 | 13.66 | 0.58 |
|  |  |  |  |  |  |  |  |
| 6-12-03B (NM) | | | | | | | |
| A | 650 | 654 | 24.30 | 2.80 | 14.00 | 24.2 | 8 |
| B | 750 | 49.51 | 30.30 | 20.40 | 20.50 | 13.47 | 0.54 |
| C | 850 | 27.98 | 28.70 | 36.80 | 13.40 | 13.71 | 0.28 |
| D | 920 | 26.22 | 23.90 | 39.90 | 8.60 | 13.91 | 0.28 |
| E | 1000 | 26.92 | 18.10 | 38.60 | 8.60 | 13.84 | 0.28 |
| F | 1075 | 27.81 | 16.70 | 37.90 | 13.40 | 14.03 | 0.26 |
| G | 1110 | 27.30 | 8.30 | 37.90 | 9.90 | 13.78 | 0.34 |
| H | 1180 | 20.60 | 2.10 | 51.30 | 8.90 | 14.06 | 0.22 |
| I | 1210 | 15.53 | 1.80 | 68.30 | 2.70 | 14.13 | 0.28 |
|  |  |  |  |  |  |  |  |
| 3-29-02 (MIT) | | | | | | | |
| 1 | 527 | 6.02 | 1.12 | 6.12 | 4.20 | 24.82 | 34.02 |
| 2 | 627 | 4.17 | 1.27 | 42.77 | 5.07 | 17.22 | 18.91 |
| 3 | 727 | 3.72 | 1.28 | 57.69 | 14.39 | 15.38 | 3.96 |
| 4 | 827 | 3.37 | 1.55 | 98.20 | 22.09 | 13.94 | 1.99 |
| 5 | 927 | 3.13 | 1.32 | 84.46 | 16.00 | 12.93 | 2.95 |
| 6 | 1027 | 3.86 | 0.76 | 82.54 | 15.26 | 15.93 | 2.74 |
| 7 | 1127 | 3.63 | 0.10 | 70.66 | 18.62 | 15.01 | 2.13 |
| 8 | 1227 | 2.71 | 0.01 | 29.53 | 4.37 | 11.20 | 15.21 |
|  |  |  |  |  |  |  |  |
| 06-27-03 (NM) | | | | | | | |
| A | 625 | 16750 | 0.34 | 1.80 | 1.10 | 364 | 162 |
| B | 700 | 65.96 | 0.56 | 15.70 | 5.90 | 13.83 | 1.06 |
| C | 750 | 22.09 | 0.82 | 48.60 | 12.10 | 14.36 | 0.26 |
| D | 800 | 15.92 | 0.84 | 65.10 | 11.50 | 13.863 | 0.182 |
| E | 875 | 13.68 | 0.76 | 75.00 | 15.10 | 13.732 | 0.166 |
| F | 975 | 14.42 | 0.57 | 71.70 | 19.60 | 13.835 | 0.16 |
| G | 1075 | 16.27 | 0.54 | 63.20 | 14.00 | 13.77 | 0.22 |
| H | 1250 | 23.32 | 0.03 | 42.30 | 18.50 | 13.38 | 0.34 |
| I | 1650 | 49.14 | 0.02 | 22.20 | 2.20 | 14.95 | 1.12 |
|  |  |  |  |  |  |  |  |
| P-20 (MIT) | | | | | | | |
| 1 | 727 | 1.04 | 3.04 | 6.28 | 0.99 | 4.32 | 19.16 |
| 2 | 777 | 3.53 | 291.41 | 69.17 | 2.86 | 14.58 | 5.29 |
| 3 | 827 | 3.89 | 164.52 | 97.48 | 4.53 | 16.05 | 4.73 |
| 4 | 877 | 3.30 | 0.00 | 92.03 | 6.00 | 13.64 | 3.2 |
| 5 | 927 | 3.47 | 42.42 | 96.13 | 5.50 | 14.32 | 2.82 |
| 6 | 977 | 3.20 | 114.48 | 90.69 | 9.94 | 13.22 | 2.43 |
| 7 | 1027 | 3.37 | 69.03 | 98.07 | 16.26 | 13.91 | 1.04 |
| 8 | 1077 | 3.23 | 26.26 | 98.85 | 25.39 | 13.34 | 0.61 |
| 9 | 1227 | 3.22 | 10.02 | 97.48 | 28.53 | 13.30 | 0.55 |
| *Note:* MIT—analysis done at CLAIR facility at MIT; NM—analysis done at New Mexico Geochronology Research Laboratory. | | | | | | | |
